# Supplementary material
Source: MDPI journal article supplement (https://www.mdpi.com/2076-3417/14/6/2484)
Supplement: s1 [file s1]

**Table S1.** Numerical data representing color of untreated coffee beans as measured in the CIELab system

| Parameter /sample | Green beans              |                          | Roasted beans            |                           |
|-------------------|--------------------------|--------------------------|--------------------------|---------------------------|
|                   | Arabica                  | Robusta                  | Arabica                  | Robusta                   |
| L*                | 63.83 ± 0.52             | 63.82 ± 0.28             | 29.14 ± 2.2 <sup>b</sup> | 33.46 ± 1.06 <sup>a</sup> |
| a*                | 1.85 ± 0.08 <sup>b</sup> | 2.25 ± 0.10 <sup>a</sup> | 10.17 ± 0.35             | 9.73 ± 0.73               |
| b*                | 16.63 ± 0.17             | 16.51 ± 0.24             | 8.56 ± 1.49              | 8.32 ± 1.41               |

All results expressed as mean value ± standard deviation; n.d. - not detected. Lowercase letters indicate statistical differences between Arabica and Robusta bean in green/roasted group.

**Table S2.** Numerical data representing coffee beans color of controls and modified samples as measured in the CIELab system

| Parameter<br>/sample  | Pepsin                         |                                |                                |                                |                                |                                | Trypsin and $\alpha$ -amylase  |                                |                                |                                 |                                |                                |
|-----------------------|--------------------------------|--------------------------------|--------------------------------|--------------------------------|--------------------------------|--------------------------------|--------------------------------|--------------------------------|--------------------------------|---------------------------------|--------------------------------|--------------------------------|
|                       | 3                              |                                | 6                              |                                | 12                             |                                | 3                              |                                | 6                              |                                 | 12                             |                                |
|                       | Control                        | Modified                        | Control                        | Modified                       |
| Green Arabica beans   |                                |                                |                                |                                |                                |                                |                                |                                |                                |                                 |                                |                                |
| L*                    | 60.63 $\pm$ 0.14 <sup>b</sup>  | 60.60 $\pm$ 1.10               | 61.55 $\pm$ 0.55 <sup>ab</sup> | 62.22 $\pm$ 0.36               | 61.91 $\pm$ 0.48 <sup>a</sup>  | 63.45 $\pm$ 1.43               | 60.05 $\pm$ 0.35               | 60.29 $\pm$ 0.41               | 60.36 $\pm$ 0.31               | 59.86 $\pm$ 0.66                | 60.15 $\pm$ 0.08               | 60.16 $\pm$ 1.42               |
| a*                    | 3.10 $\pm$ 0.10 <sup>*</sup>   | 3.38 $\pm$ 0.17 <sup>A*</sup>  | 3.02 $\pm$ 0.08 <sup>*</sup>   | 2.54 $\pm$ 0.05 <sup>B*</sup>  | 2.92 $\pm$ 0.15 <sup>*</sup>   | 2.29 $\pm$ 0.16 <sup>B*</sup>  | 3.44 $\pm$ 0.09 <sup>b</sup>   | 3.30 $\pm$ 0.12                | 3.50 $\pm$ 0.11 <sup>ab*</sup> | 3.23 $\pm$ 0.06 <sup>*</sup>    | 3.67 $\pm$ 0.07 <sup>a*</sup>  | 3.46 $\pm$ 0.13 <sup>*</sup>   |
| b*                    | 18.59 $\pm$ 0.16 <sup>*</sup>  | 19.3 $\pm$ 0.17 <sup>*</sup>   | 18.55 $\pm$ 0.25 <sup>*</sup>  | 17.94 $\pm$ 0.29 <sup>*</sup>  | 18.23 $\pm$ 0.27 <sup>*</sup>  | 17.39 $\pm$ 0.1 <sup>*</sup>   | 17.97 $\pm$ 0.19 <sup>b*</sup> | 18.73 $\pm$ 0.17 <sup>a*</sup> | 18.79 $\pm$ 0.24 <sup>a*</sup> | 17.88 $\pm$ 0.22 <sup>b*</sup>  | 18.97 $\pm$ 0.05 <sup>a*</sup> | 17.7 $\pm$ 0.05 <sup>b*</sup>  |
| Green Robusta beans   |                                |                                |                                |                                |                                |                                |                                |                                |                                |                                 |                                |                                |
| L*                    | 53.02 $\pm$ 0.08 <sup>*</sup>  | 57.00 $\pm$ 0.24 <sup>*</sup>  | 55.79 $\pm$ 0.17 <sup>*</sup>  | 57.27 $\pm$ 0.17 <sup>*</sup>  | 56.42 $\pm$ 0.42 <sup>*</sup>  | 57.37 $\pm$ 0.44 <sup>*</sup>  | 54.13 $\pm$ 0.34 <sup>*</sup>  | 56.05 $\pm$ 0.48 <sup>a*</sup> | 54.43 $\pm$ 0.18               | 55.1 $\pm$ 0.55 <sup>b</sup>    | 52.54 $\pm$ 0.28 <sup>*</sup>  | 56.76 $\pm$ 0.37 <sup>a*</sup> |
| a*                    | 3.55 $\pm$ 0.13 <sup>a*</sup>  | 2.69 $\pm$ 0.12 <sup>B*</sup>  | 3.23 $\pm$ 0.01 <sup>b*</sup>  | 2.95 $\pm$ 0.04 <sup>A*</sup>  | 3.04 $\pm$ 0.11 <sup>b</sup>   | 2.99 $\pm$ 0.09 <sup>A</sup>   | 3.48 $\pm$ 0.06 <sup>*</sup>   | 2.97 $\pm$ 0.04 <sup>B*</sup>  | 3.72 $\pm$ 0.09 <sup>*</sup>   | 3.4 $\pm$ 0.12 <sup>A*</sup>    | 3.86 $\pm$ 0.01 <sup>*</sup>   | 3.14 $\pm$ 0.03 <sup>B*</sup>  |
| b*                    | 16.98 $\pm$ 0.29 <sup>b*</sup> | 18.36 $\pm$ 0.55 <sup>A*</sup> | 17.31 $\pm$ 0.12 <sup>ab</sup> | 16.41 $\pm$ 0.78 <sup>B</sup>  | 17.53 $\pm$ 0.16 <sup>a</sup>  | 17.21 $\pm$ 0.27 <sup>AB</sup> | 16.93 $\pm$ 0.05 <sup>c</sup>  | 16.63 $\pm$ 0.36               | 17.5 $\pm$ 0.17 <sup>a*</sup>  | 16.05 $\pm$ 0.22 <sup>*</sup>   | 17.18 $\pm$ 0.11 <sup>b*</sup> | 16.49 $\pm$ 0.31 <sup>*</sup>  |
| Roasted Arabica beans |                                |                                |                                |                                |                                |                                |                                |                                |                                |                                 |                                |                                |
| L*                    | 35.35 $\pm$ 0.03 <sup>b</sup>  | 35.01 $\pm$ 0.44 <sup>B</sup>  | 34.83 $\pm$ 0.80 <sup>b</sup>  | 35.47 $\pm$ 0.93 <sup>AB</sup> | 37.49 $\pm$ 0.12 <sup>a*</sup> | 36.44 $\pm$ 0.27 <sup>A*</sup> | 34.71 $\pm$ 0.75 <sup>c*</sup> | 32.19 $\pm$ 0.80 <sup>B*</sup> | 35.60 $\pm$ 0.46 <sup>b*</sup> | 32.44 $\pm$ 0.19 <sup>AB*</sup> | 38.35 $\pm$ 0.18 <sup>a*</sup> | 33.59 $\pm$ 0.44 <sup>A*</sup> |
| a*                    | 10.29 $\pm$ 0.02 <sup>a*</sup> | 9.95 $\pm$ 0.02 <sup>B*</sup>  | 10.28 $\pm$ 0.17 <sup>b</sup>  | 9.93 $\pm$ 0.20 <sup>B</sup>   | 10.11 $\pm$ 0.10 <sup>b</sup>  | 10.44 $\pm$ 0.05 <sup>A*</sup> | 10.39 $\pm$ 0.08 <sup>b</sup>  | 10.6 $\pm$ 0.30 <sup>B</sup>   | 10.88 $\pm$ 0.06 <sup>a</sup>  | 10.8 $\pm$ 0.16 <sup>AB</sup>   | 10.52 $\pm$ 0.06 <sup>b*</sup> | 11.24 $\pm$ 0.31 <sup>A*</sup> |
| b*                    | 9.86 $\pm$ 0.60 <sup>b</sup>   | 9.75 $\pm$ 0.50 <sup>B</sup>   | 10.35 $\pm$ 0.20 <sup>ab</sup> | 9.61 $\pm$ 0.80 <sup>B</sup>   | 11.05 $\pm$ 0.21 <sup>a</sup>  | 11.71 $\pm$ 0.71 <sup>A</sup>  | 10.85 $\pm$ 0.19 <sup>c*</sup> | 13.41 $\pm$ 0.98 <sup>B*</sup> | 12.70 $\pm$ 0.14 <sup>a*</sup> | 13.53 $\pm$ 0.34 <sup>B*</sup>  | 11.29 $\pm$ 0.10 <sup>b*</sup> | 15.97 $\pm$ 0.56 <sup>A*</sup> |
| Roasted Robusta beans |                                |                                |                                |                                |                                |                                |                                |                                |                                |                                 |                                |                                |
| L*                    | 34.38 $\pm$ 0.17 <sup>b</sup>  | 32.12 $\pm$ 2.42 <sup>B</sup>  | 35.28 $\pm$ 0.75 <sup>b</sup>  | 34.27 $\pm$ 0.5 <sup>AB</sup>  | 37.32 $\pm$ 0.31 <sup>a</sup>  | 36.11 $\pm$ 0.7 <sup>A</sup>   | 31.73 $\pm$ 0.54 <sup>c*</sup> | 34.82 $\pm$ 0.15 <sup>B*</sup> | 34.09 $\pm$ 0.64 <sup>b*</sup> | 35.93 $\pm$ 0.63 <sup>A*</sup>  | 35.55 $\pm$ 0.38 <sup>a</sup>  | 36.18 $\pm$ 0.43 <sup>A</sup>  |
| a*                    | 9.92 $\pm$ 0.07                | 10.1 $\pm$ 0.46                | 9.89 $\pm$ 0.05                | 9.85 $\pm$ 0.02                | 9.43 $\pm$ 0.14 <sup>*</sup>   | 9.82 $\pm$ 0.19 <sup>*</sup>   | 10.35 $\pm$ 0.11 <sup>a*</sup> | 9.82 $\pm$ 0.14 <sup>*</sup>   | 9.93 $\pm$ 0.08 <sup>b</sup>   | 10.04 $\pm$ 0.13                | 9.86 $\pm$ 0.27 <sup>b</sup>   | 9.98 $\pm$ 0.13                |
| b*                    | 11.28 $\pm$ 0.09 <sup>*</sup>  | 13 $\pm$ 0.66 <sup>*</sup>     | 11.33 $\pm$ 0.05               | 10.94 $\pm$ 0.18               | 8.32 $\pm$ 0.21                | 10.82 $\pm$ 0.4                | 14.24 $\pm$ 0.64 <sup>a*</sup> | 10.53 $\pm$ 0.47 <sup>*</sup>  | 10.31 $\pm$ 0.06 <sup>c</sup>  | 11.25 $\pm$ 0.81                | 11.63 $\pm$ 0.61 <sup>b</sup>  | 11.24 $\pm$ 0.06               |

All results expressed as mean value  $\pm$  standard deviation; n.d. - not detected. Lowercase letters indicate significant differences between control samples at different modification times. Uppercase letters indicate significant differences between modified samples at different modification times.

\* indicates significant difference between control and modified samples at the same modification time.
